# 1 Identification of the relative timing of infectiousness 2 and symptom onset for outbreak control

3 Robert C. Cope<sup>a</sup> and Joshua V. Ross<sup>a,1</sup>

4 <sup>a</sup>The University of Adelaide, Stochastic Modelling & Operations Research  
5 Group, School of Mathematical Sciences, Adelaide SA 5005, AUSTRALIA.

6 <sup>1</sup>To whom correspondence should be addressed; E-mail:

7 `joshua.ross@adelaide.edu.au`.

8 **In an outbreak of an emerging disease the epidemiological characteristics of**  
9 **the pathogen may be largely unknown. A key determinant of ability to control**  
10 **the outbreak is the relative timing of infectiousness and symptom onset. We**  
11 **provide a method for identifying this relationship with high accuracy based**  
12 **on data from household-stratified symptom-onset data. Further, this can be**  
13 **achieved with observations taken on only a few specific days, chosen optimally,**  
14 **within each household. This constitutes an important tool for outbreak re-**  
15 **sponse. An accurate and computationally-efficient heuristic for determining**  
16 **the optimal surveillance scheme is introduced. This heuristic provides a novel**  
17 **approach to optimal design for Bayesian model discrimination.**

18 **Keywords:** Bayesian model discrimination; epidemiology; optimal experimental design;  
19 random forests.

## 20 **Introduction**

21 The timing of infectiousness relative to symptom onset has been identified as a key factor in  
22 ability to control an outbreak (*11*). The explanation is intuitive: If symptoms appear before  
23 infectiousness, then contact tracing and isolation strategies will be effective, whereas for post-  
24 infectiousness symptom presentation, broader, non-symptom based strategies must be adopted.

25 Consequently, identifying the relative timing as early as possible in an outbreak is imperative to  
26 assessing potential for control and selecting a measured response.

27

28 Severe acute respiratory syndrome (SARS) is a prime example of a disease in which symp-  
29 toms foreshadow significant levels of infectiousness (2). This played a critical role in limiting  
30 mortality and morbidity in outbreaks during 2003, via simple public health measures such as  
31 isolation and quarantining (2, 8, 11, 14, 16, 18). Smallpox is most similar to SARS in this respect,  
32 but must be contrasted with HIV, where a large proportion of secondary infections occur before  
33 symptoms (11). For influenza, the relationship is less clear, with symptoms and infectiousness  
34 likely coinciding closely, with some transmission possible before symptom onset (17, 21). This  
35 relationship will not be known in an outbreak of an emerging pathogen, and one must turn to  
36 early outbreak surveillance data for insights.

37

38 Many jurisdictions organize their emerging disease monitoring policies around households.  
39 As an example, First Few Hundred studies are proposed as a first response surveillance scheme  
40 following the identification of a novel disease and/or strain as part of national pandemic plans (3,  
41 12, 19). Following the observation of a first symptomatic individual, their household is enrolled  
42 in an intensive surveillance program, so that day of symptom onset for subsequent cases within  
43 that household are recorded. Methods have recently been developed to characterise transmis-  
44 sibility and severity of a novel pathogen – other factors influencing ability to control an out-  
45 break (11) – based on such data. Currently lacking is a method for accurate determination of  
46 relative timing of infectiousness and symptom onset using this data.

47

48 Here we introduce, and demonstrate through a simulation study, a method for identifying  
49 with high accuracy the timing of infectiousness relative to symptom onset from household-  
50 stratified symptom surveillance data. Remarkably, we show this is achievable with observations  
51 taken on only a few specific days, chosen optimally, within each household. Our approach to  
52 determining the optimal surveillance scheme is based on an efficient heuristic. This heuristic  
53 provides a general, computationally-efficient approach to optimal design for Bayesian model  
54 discrimination.

## 55 **Bayesian model discrimination for outbreak control**

56 We model disease dynamics within each household as a continuous-time Markov chain (15),  
57 that counts the number of household members that are susceptible (S), exposed (E), infectious  
58 (I), or recovered (and immune; R). Under this model, the timing of symptom onset relative to in-  
59 fectionousness is mapped to which transition is observed: symptoms appear either upon infection,  
60 infectiousness, or recovery. The challenge is to determine which of these three (observation)  
61 models best describes the household-stratified symptom-onset data (Figure 1a).

62  
63 There is a relatively rich literature on Bayesian model discrimination (1, 7, 10, 29), and opti-  
64 mal design for such (6, 28), which are the most appropriate tools and framework to address this  
65 question. A general difficulty with this theory is that practical implementation is at best diffi-  
66 cult, and often infeasible. This has led to methods based on approximate Bayesian computation  
67 (ABC), which requires only simulation of realisations from each model, and is computationally  
68 feasible for a wide range of models. Unfortunately, there exists ‘a fundamental difficulty’ in  
69 establishing robust methods based upon summary statistics (25, 26); however, see the recent  
70 work of Dehideniya *et al.* (9).

71  
72 Another approach to model discrimination in an ABC framework has been proposed by  
73 Pudlo *et al.* (22). They treat model discrimination as a classification problem, for which ma-  
74 chine learning methods are ideal, and in particular propose the use of random forests to perform  
75 this task. This approach provides a highly-efficient, and importantly, robust method for model  
76 discrimination. Hainy *et al.* (13) expand on this approach as specifically applied to optimal  
77 design for model discrimination.

78  
79 We apply these tools, first for accurate, robust characterisation of relative timing of symp-  
80 toms and infectiousness, and second, for optimal design of early outbreak surveillance for accu-  
81 rate model discrimination. Specifically, the aim of the latter is to select an optimal surveillance  
82 scheme, consisting of a fixed number of observations, in order to discriminate three differ-  
83 ent timings of symptom onset relative to infectiousness, within a household-stratified epidemic  
84 model. We evaluate the impact of assumptions and summary statistics. Additionally, we pro-  
85 pose a new, computationally-efficient and highly-accurate heuristic for optimal design choice,  
86 which in this application determines the optimal days upon which to perform surveillance in

87 households.

88

## 89 **Methods**

### 90 **Epidemic model**

91 We demonstrate using an example system of a novel infectious disease, spreading in a popu-  
92 lation structured into households. We assume that the population is large and mixing between  
93 households is random, such that after a household is initially infected, the remaining transmis-  
94 sion within the household is independent of transmission outside the household (5, 27). There-  
95 fore, transmission dynamics within households can be modelled independently (4). Given this  
96 novel etiological agent, we wish to determine if symptom onset occurs at the time of infection,  
97 infectiousness, or recovery (i.e., these are the three candidate models we wish to discriminate).  
98 The model behaviours are otherwise assumed identical. To be emphatic, the underlying disease  
99 dynamics is identical in all three models, each differing only in when observations are made,  
100 corresponding to different timings of symptom onset (Figure 1a).

101

102 We model the epidemic dynamics in households as a continuous-time Markov chain (Figure  
103 1a) (15). Individuals transition from susceptible (S) to exposed (E), then to infectious (I), and  
104 finally to recovered (R), with rates as described in Table 1.

Table 1: Events, transitions and rates within a household.

| Description    | Transition                          | Rate                 |
|----------------|-------------------------------------|----------------------|
| Infection      | $(S, I) \rightarrow (S - 1, E + 1)$ | $\beta SI / (N - 1)$ |
| Infectiousness | $(E, I) \rightarrow (E - 1, I + 1)$ | $\sigma E$           |
| Recovery       | $(I, R) \rightarrow (I - 1, R + 1)$ | $\gamma I$           |

105 We assign a distribution to each parameter (Supplemental Figure S1), based on physical  
106 quantities to reflect the assumed prior knowledge of the etiological agent:

- 107 •  $\frac{1}{\sigma} \sim \text{Gamma}(6, 1/2)$ , representing a mean exposed duration of 3 days (mode at approxi-  
108 mately 2.5 days);

- 109 •  $\frac{1}{\gamma} \sim \text{Gamma}(6, 1/2)$ , representing a mean infectious duration of 3 days (mode at approx-  
110 imately 2.5 days); and,
- 111 •  $R_0 \sim 1 + \text{Gamma}(2, 1/2)$ , representing a mean  $R_0$  (the expected number of secondary  
112 cases caused by an infectious individual in a fully susceptible population) of 2 (mode at  
113 approximately 1.5).

114 These distributions are sampled per-simulation, i.e., sampled parameters are kept constant across  
115 all households within a given epidemic. We also test the accuracy of model discrimination when  
116 these parameters are known, fixed quantities ( $\beta = \frac{2}{3}$ ,  $\sigma = \gamma = \frac{1}{3}$ ; see Supplemental Figure S3  
117 for results).

118  
119 Following the first symptomatic case in a household, the number of symptomatic cases  
120 within the household is observed daily; i.e., the instant that the first individual in a household  
121 shows symptoms is time zero. Then, the number of cases seen before time 1 constitutes the first  
122 observation, between time 1 and 2 the next observation, and so on. This proceeds for 14 days,  
123 with any symptoms occurring after time 14 not observed.

124  
125 When testing the effect of asymptomatic infections on model discrimination, we sample an  
126 additional parameter,  $p_{\text{obs}}$ , the probability that an individual shows symptoms at the time they  
127 would in the model in question. We explored two scenarios: (1)  $p_{\text{obs}} \sim \text{Beta}(5, 5)$  (i.e., a mean  
128  $p_{\text{obs}}$  of 0.5), and (2)  $p_{\text{obs}} \sim \text{Beta}(7.5, 2.5)$  (i.e., a mean  $p_{\text{obs}}$  of 0.75).

## 129 **Random forest model selection**

130 To attempt to discriminate models, we use the approximate Bayesian random forest approach  
131 of Pudlo *et al.* (22). This proceeds as follows:

- 132 • Select a number of simulations,  $N_s$ , and a number of households,  $N_h$ .
- 133 • For each model:
  - 134 – Sample a set of parameters  $\theta = (R_0, \sigma, \gamma)$  from the (prior) distributions.
  - 135 – Simulate  $N_h$  households given these parameters.
  - 136 – Repeat this process  $N_s$  times.

- 137 • Given the  $N_s$  simulations from each model, extract the data corresponding to the consid-  
138 ered design.
- 139 • Construct a random forest that predicts the model label, given the simulations.
- 140 • Assess the accuracy of the process on a left-out test set.

141 Once a design has been chosen, to employ this process when an outbreak is observed it would be  
142 input to the (trained) random forest, to obtain a prediction of which model it is most consistent  
143 with.

144 Random forests were constructed using the Python scikit-learn RandomForestClassifier al-  
145 gorithm (23), with 200 trees.

## 146 **Summary statistics**

147 To more effectively use the household data in training the random forest, we summarize raw  
148 household data as daily histograms of incidence, as in Figure 1c. That is, we count the propor-  
149 tion of households that, on day  $d$ , observed an incidence of  $i$ , and then use the resultant (design  
150 size)  $\times$  (household size + 1) data vector as the new random forest predictors. For example,  
151 with designs of size 5, households of size 5, and 200 households, the raw data would consist  
152 of  $5 \times 200 = 1000$  predictors, whereas the histogram summaries would consist of  $5 \times 6 = 30$   
153 predictors.

## 154 **Optimal sampling design**

155 Conducting a First Few Hundred-style study can be extremely labour intensive. Consequently,  
156 we wish to assess the potential for model discrimination when sampling is only performed on a  
157 subset of days, rather than every day. If we choose to only sample on  $D < 14$  days, within the  
158 first 14 days following the first symptomatic case in each household, we must necessarily also  
159 choose the optimal days on which to sample. We choose those days that produce the highest  
160 classification accuracy on a left-out test set. This design problem is small, with only  $\binom{14}{D}$  designs  
161 of size  $D$  (or  $2^{14} = 16,384$  total designs) to evaluate, so we apply exhaustive search in this case;  
162 however a combinatorial optimisation algorithm could be applied and would likely be necessary  
163 in a more complex design problem to search for the optimal design.

## 164 **Heuristic solution**

165 Rather than evaluating the full set of possible designs, or applying an optimisation algorithm,  
166 we propose a heuristic for efficiently finding high-quality designs of a given size. This heuristic  
167 is to perform random forest model selection on the largest possible design, extract the random  
168 forest feature importance (Figure 1b), and use this random forest feature importance to rank  
169 design points. Specifically, days are ranked on their maximum feature importance; the sum of  
170 the importance of features from a day was also tested, but had inferior performance. A design  
171 of size  $d$  uses the highest-ranked  $d$  design points. The random forest feature importance metric  
172 we use is the mean decrease in Gini impurity (24) of a feature across the trees in the random  
173 forest (this metric is easily extracted from the python scikit-learn random forest algorithm (23)).

## 174 **Results**

175 Random forest-based Bayesian model discrimination was able to accurately discriminate rela-  
176 tive timing of symptoms and infectiousness for simulated household-stratified symptom-onset  
177 data: with 200 households of size 5, accuracy was 0.923 (with random parameters, and 10,000  
178 training simulations per model). Accuracy was reduced with fewer households: to 0.853 with  
179 100 households, and 0.657 with only 25 households (Figure 1d). These results were robust with  
180 respect to variation in household size, with accuracy ranging from 0.892 with 200 households  
181 of size 3 to 0.935 with 200 households of size 7.

182

183 Remarkably, model discrimination remained accurate when only a small subset of daily  
184 household data were observed, when the observations were from an optimal design: a design of  
185 size 5 and 190 households was sufficient to produce a classification accuracy of  $\geq 0.90$  (Figure  
186 1d, Figure 2a). Accuracy increased as the design size (i.e., number of days of surveillance) and  
187 the number of households increased. The heuristic produced the exact optimal design at design  
188 sizes 4 and 5 (Figure 2b), and an effectively indistinguishable level of accuracy compared to  
189 the optimal for larger design sizes (Figure 1d). The heuristic ensured a substantial reduction  
190 in computation time: to produce Figure 1d, 39 random forests were required when using the  
191 heuristic, compared to 49,107 random forests to produce the optimal results. We also explored  
192 the impact of varying household size, the amount of training data used, and of using fixed,  
193 known parameters rather than parameters sampled from a distribution: larger households and  
194 more training points produced small increases in accuracy (Supplemental Figures S2, S3), and

195 known epidemic parameters produced substantial increases in accuracy (Supplemental Figure  
196 S3).

197 The key design points (i.e., sampling days) for optimal designs were consistently the first  
198 day (Figure 2b), followed by other days early in the outbreak (i.e., days 2–4), and the final  
199 sampling day (day 14). Days 6–13 typically had little impact on model discrimination accuracy  
200 (i.e., optimal Accuracy consistently levelled off as design size increased beyond 5; Figure 1d,  
201 Supplemental Figure S3), and the optimal combination of these days varied due to stochasticity  
202 in both training and test data. This is consistent with the feature importance used to develop  
203 the heuristic (Figure 1b), i.e., those days that were consistently optimal were those with highest  
204 feature importance.

205

206 To assess the impact of asymptomatic infections on model discrimination, we repeated the  
207 analysis, except with each individual only being symptomatic (at the point that they otherwise  
208 would) with probability  $p_{\text{obs}}$  (again, sampled from a prior distribution). This partial observation  
209 made model discrimination substantially more challenging: with designs of size 5 and 200  
210 households (Figure 2a), accuracy was 0.796 when  $p_{\text{obs}}$  had a mean of 0.75, and accuracy was  
211 0.653 when  $p_{\text{obs}}$  had a mean of 0.5 (compared to 0.908 with complete observation).

## 212 Discussion

213 Identifying the relative timing of symptom onset and infectiousness in an emerging epidemic is  
214 critical to outbreak control. We have demonstrated that it is not only possible to accurately iden-  
215 tify the relative timing based upon household-stratified data available early in an outbreak, but  
216 that it can be done without observing each household every day. Moreover, we can use random  
217 forest feature importance to inform a heuristic that vastly reduces the computation necessary to  
218 choose high-accuracy designs.

219

220 It is remarkable that it is possible to discriminate models so accurately, given that they share  
221 identical epidemic dynamics, and only differ in observation. The non-parametric nature of the  
222 random forest is able to use small but clear differences between models (e.g., Figure 2c) to  
223 extract sufficient information to discriminate them. Combining the raw household data to form  
224 summary statistics is critical to this: if the raw household data is used rather than the summary



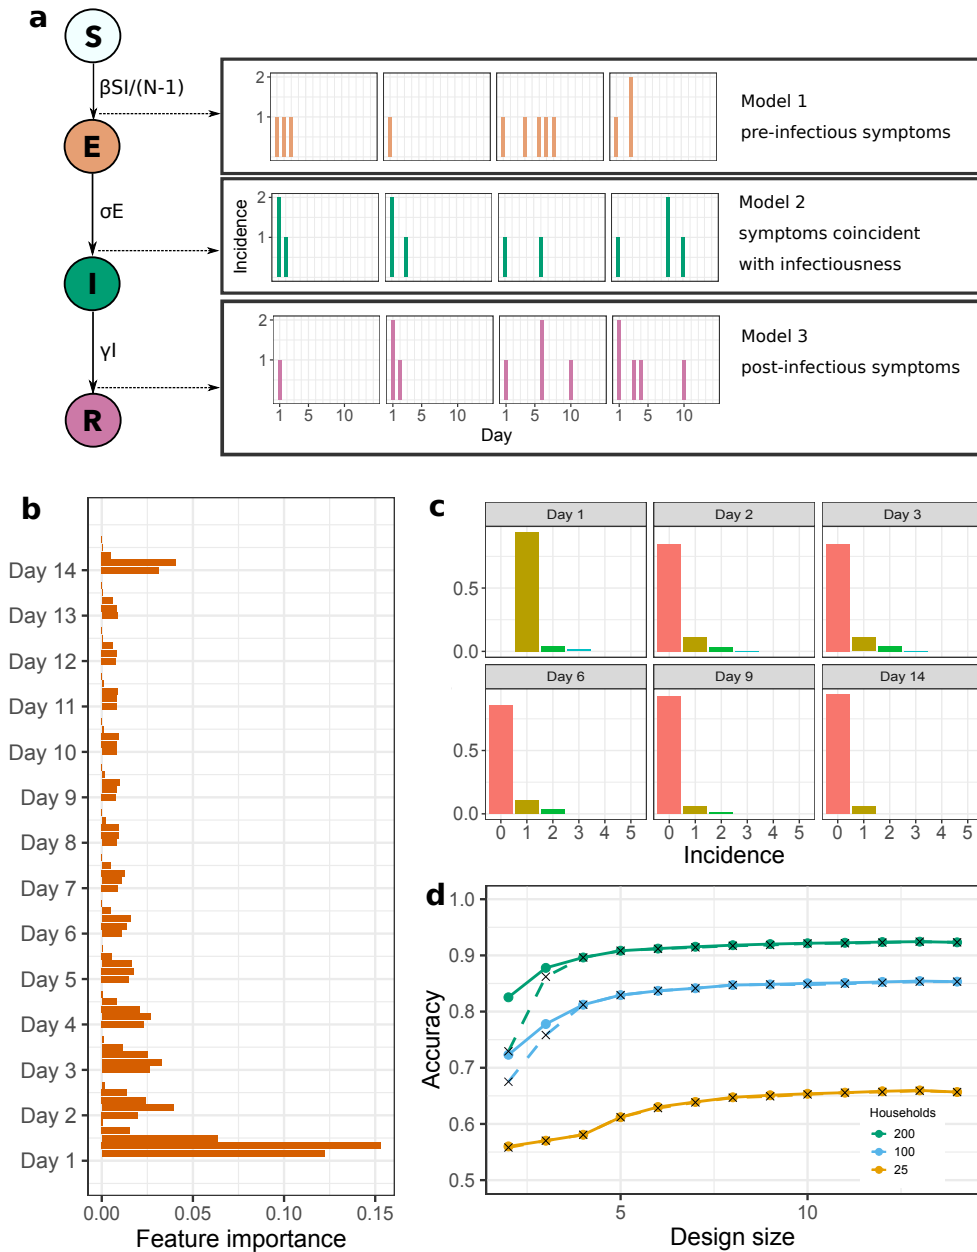

Figure 1: (a) Model schematic describing: transitions between states within each household continuous-time Markov chain; the three observation models being discriminated between; and, the way that these household-level data are observed. (b) Random forest feature importance for the full 14-day design, used to construct the heuristic for smaller designs. (c) Histogram summaries of the daily household-level data under a given design, used as predictors in the random forest. (d) Resulting random forest accuracy as design size increases, for the true optimal design (solid lines) and heuristic solution (crosses with dashed line). These results correspond to households of size 5, with 10,000 training samples from each model, each with parameters drawn from the distributions displayed in Supplemental Figure S1.

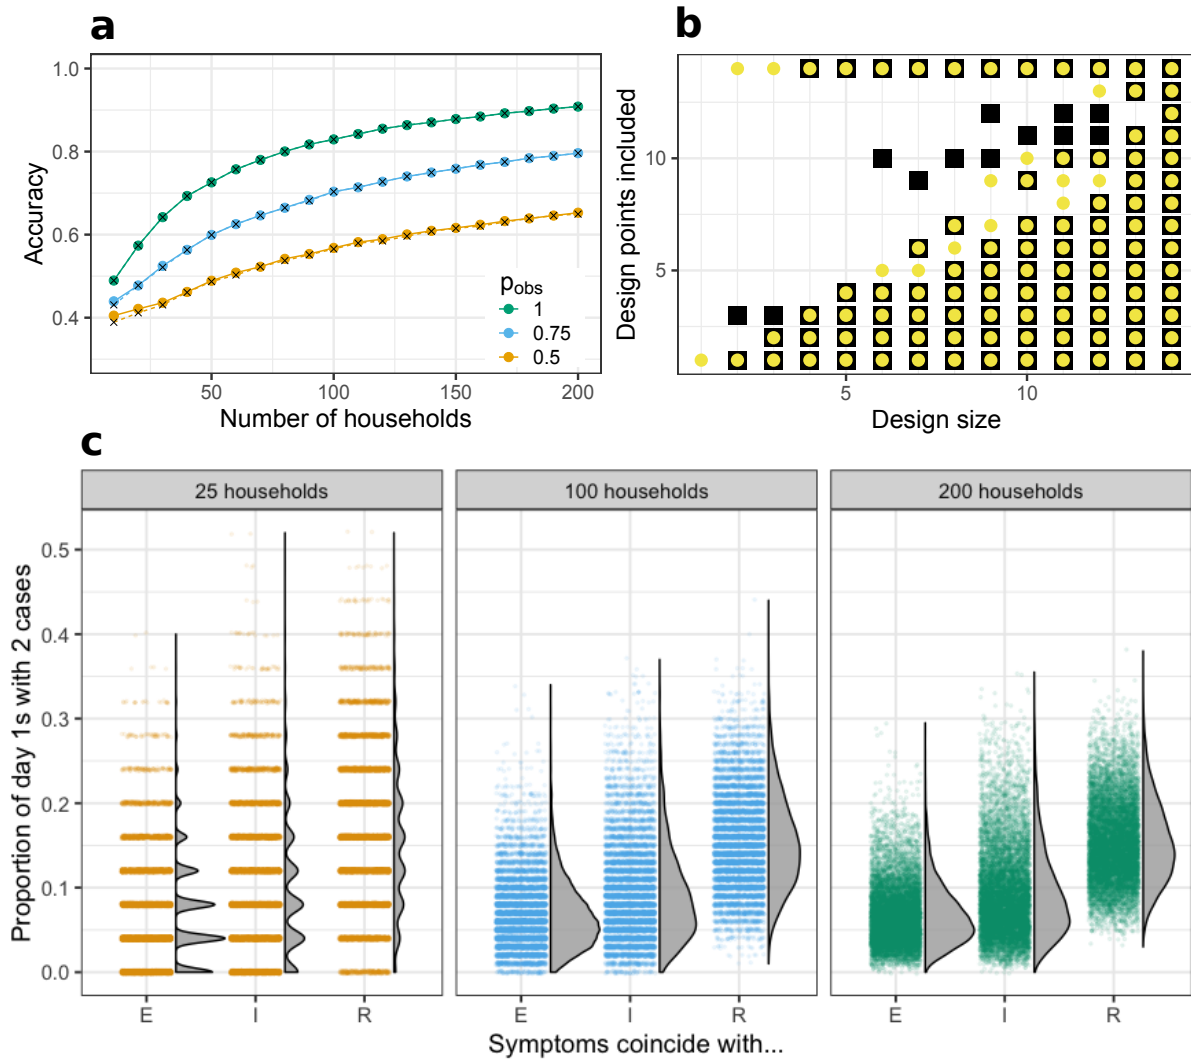

Figure 2: (a) Accuracy of model discrimination in designs of size 5, as the number of households increases, and under partial observation. Note that  $p_{\text{obs}}$  is not a fixed parameter but is sampled from a distribution; the listed value is its mean. The case with mean  $p_{\text{obs}}$  of 0.5 was sampled from a Beta(5,5) distribution, and a mean  $p_{\text{obs}}$  of 0.75 from a Beta(7.5,2.5) distribution. (b) Difference between heuristic designs (coloured points) and optimal designs (black boxes) as the design size increases. Note that the heuristic selects the optimal design at design sizes 4, 5, 13, and 14. (c) Distribution of training sample observations (under each model and number of households) for the most important feature under the heuristic: the proportion of households with 2 cases observed on day 1. These results correspond to households of size 5, with 10,000 training samples from each model, each with parameters drawn from the distributions that appear in Supplemental Figure S1.

225 statistics, accuracy is substantially lower (Supplemental Figure S4). While it can be difficult  
226 to interpret the classifications made by a random forest-classifier, interrogating key individual  
227 predictors (as in Figure 2c) provides clarity, and elucidates why feature importance provides a  
228 useful heuristic for choosing optimal designs (20).

229

230 The accuracy of model discrimination decreases substantially as the proportion of cases that  
231 are asymptomatic increases. However, this can be compensated by increasing the number of  
232 households. The outbreaks in which early control is most critical are likely to be those in which  
233 most individuals are symptomatic, due to symptoms being strongly correlated with severity, for  
234 example hospitalisations and deaths.

235

236 In some situations it may be necessary to consider more complicated surveillance schemes,  
237 in which case it may not be possible to evaluate the exact optimal design by exhaustive search.  
238 However, the heuristic proposed here should remain effective in more complicated design  
239 spaces, provided they have a similar form, i.e., designs of a given size are a subset of designs of  
240 larger sizes upon which the random forest can be trained to extract feature importance.

241

242 Assumptions impact any model-based study. Here assumptions include: a constant house-  
243 hold size; enrolling each household in the study at the instant its first member shows symptoms;  
244 and, most critically, assuming that the underlying epidemic model is true. It is possible to select  
245 between models that differ in addition to observation process; however any increase in the num-  
246 ber of models to classify will likely result in increased computation and potentially decreased  
247 accuracy.

248

249 In the future, the aim is to combine Bayesian model discrimination and parameter estimation  
250 in an online manner. Improving estimates of parameters improves the ability to discriminate  
251 models, and, more certainty regarding the model likely reduces variance in parameter estimates.  
252 This would allow for unified characterisation of all factors influencing the ability to control an  
253 outbreak.

## 254 Funding

255 R.C.C. and J.V.R. received funding from the Data To Decisions Cooperative Research Centre  
256 (D2D CRC). J.V.R. received funding from the Australian Research Council through the Fu-  
257 ture Fellowship scheme (FT130100254). J.V.R. received funding through the Centre of Excel-  
258 lence for Mathematical and Statistical Frontiers (ACEMS). J.V.R. and R.C.C. received funding  
259 through the National Health and Medical Research Council (NHMRC) Centre of Research  
260 Excellence for Policy Relevant Infectious Disease Simulation and Mathematical Modelling  
261 (PRISM2). This work was supported with supercomputing resources provided by the Phoenix  
262 HPC service at the University of Adelaide.

## 263 References

- 264 1. N. Alzahrani, P. Neal, S.E. Spencer, T.J. McKinley and P. Touloupou Model selection for  
265 time series of count data. *Computational Statistics Data Analysis* 122, 33-44 (2018).
- 266 2. R.M. Anderson, C. Fraser, A.C. Ghani, C.A. Donnelly, S. Riley, N.M. Ferguson, G.M.  
267 Leung, T.H. Lam and A.J. Hedley Epidemiology, transmission dynamics and control of  
268 SARS: the 2002-2003 epidemic. *Philos Trans R Soc Lond B Biol Sci.* 359, 1091-1105  
269 (2004).
- 270 3. Australian Health Management Plan for Pandemic Influenza.  
271 [http://www.health.gov.au/internet/main/publishing.nsf/content](http://www.health.gov.au/internet/main/publishing.nsf/content/519F9392797E2DDCCA257D47001B9948/%24File/AHMPPPI.pdf)  
272 [/519F9392797E2DDCCA257D47001B9948/%24File/AHMPPPI.pdf](http://www.health.gov.au/internet/main/publishing.nsf/content/519F9392797E2DDCCA257D47001B9948/%24File/AHMPPPI.pdf) (accessed  
273 22/02/19).
- 274 4. A.J. Black, N. Geard, J.M. McCaw, J. McVernon and J.V. Ross Characterising pandemic  
275 severity and transmissibility from data collected during first few hundred studies. *Epi-*  
276 *demics* 19, 61-73 (2017).
- 277 5. A. Black, T. House, M.J. Keeling and J.V. Ross Epidemiological consequences of  
278 household-based antiviral prophylaxis for pandemic influenza. *Journal of the Royal Society*  
279 *Interface* 10, 20121019 (2013).
- 280 6. K. Chaloner and I. Verdinelli Bayesian experimental design: a review. *Stat. Sci.* 10, 273304  
281 (1995).

- 282 7. N. Chopin, P.E. Jacob and O. Papaspiliopoulos SMC2: an efficient algorithm for sequential  
283 analysis of state space models. *Journal of the Royal Statistical Society: Series B (Statistical*  
284 *Methodology)* 75, 397-426 (2013).
- 285 8. T. Day, A. Park, N. Madras, A. Gumel and J. Wu When Is Quarantine a Useful Con-  
286 trol Strategy for Emerging Infectious Diseases?, *American Journal of Epidemiology* 163,  
287 479485, <https://doi.org/10.1093/aje/kwj056> (2006).
- 288 9. M.B. Dehideniya, C.C. Drovandi and J.M. McGree Optimal Bayesian design for discrimi-  
289 nating between models with intractable likelihoods in epidemiology. *Computational Statis-*  
290 *tics Data Analysis* 124, 277-297, <https://doi.org/10.1016/j.csda.2018.03.004> (2018).
- 291 10. C.C. Drovandi and R.A. McCutchan Alive SMC2: Bayesian model selection for low-count  
292 time series models with intractable likelihoods. *Biometrics* 72, 344-353 (2016).
- 293 11. C. Fraser, S. Riley, R.M. Anderson and N.M. Ferguson Factors that make an infectious  
294 disease outbreak controllable. *Proc. Natl. Acad. Sci. U.S.A.* 101(16): 61466151 (2004).
- 295 12. A.B. van Gageldonk-Lafeber, M.A. van der Sande, A. Meijer, I.H. Friesema, G.A. Donker,  
296 J. Reimerink *et al.* Utility of the first few 100 approach during the 2009 influenza A(H1N1)  
297 pandemic in the Netherlands. *Antimicrob. Resist. Infect. Control.* 1:30 (2012).
- 298 13. M. Hainy, D.J. Price, O. Restif and C. Drovandi Optimal Bayesian design for model dis-  
299 crimination via classification. <https://arxiv.org/abs/1809.05301> (2018).
- 300 14. Y.H. Hsieh, C.C. King, C.W. Chen, M.S. Ho, J.Y. Lee, F.C. Liu, Y.C. Wu, *et al.* Quarantine  
301 for SARS, Taiwan. *Emerging infectious diseases* 11, 278-82 (2005).
- 302 15. M.J. Keeling and J.V. Ross On methods for studying stochastic disease dynamics. *Journal*  
303 *of the Royal Society Interface* 5, 171-181 (2008).
- 304 16. T.G. Ksiazek, E. Erdman, C.S. Goldsmith, S.R. Zaki, T. Peret, S. Emery, S. Tong, C. Ur-  
305 bani, J.A. Comer, W. Lim, *et al.* A Novel Coronavirus Associated with Severe Acute Res-  
306 piratory Syndrome. *N. Engl. J. Med.* 348 , 1953-1966 (2003).
- 307 17. L.L. Lau, B.J. Cowling, V.J. Fang, K.H. Chan, E.H. Lau, *et al.* Viral shedding and clinical  
308 illness in naturally acquired influenza virus infections. *J Infect Dis* 201, 15091516 (2010).

- 309 18. N. Lee, D. Hui, A. Wu, P. Chan, P. Cameron, G.M. Joynt, A. Ahuja, M.Y. Yung, C.B.  
310 Leung, K.F. To, *et al.* A Major Outbreak of Severe Acute Respiratory Syndrome in Hong  
311 Kong. *N. Engl. J. Med.* 348, 1986-1994 (2003).
- 312 19. E. McLean, R.G. Pebody, C. Campbell, M. Champerland *et al.* Pandemic (H1N1) 2009 in-  
313 fluenza in the UK: Clinical and epidemiological findings from the first few hundred (FF100)  
314 cases. *Epidemiology & Infection* 138, 1531-1541 (2010).
- 315 20. C. Molnar *Interpretable Machine Learning: A guide for making black box models explain-*  
316 *able.* <https://christophm.github.io/interpretable-ml-book/> (2019).
- 317 21. E. Patrozou and L.A. Mermel Does influenza transmission occur from asymptomatic infec-  
318 tion or prior to symptom onset? *Public Health Rep* 124, 193196 (2009).
- 319 22. P. Pudlo, J-M. Marin, A. Estoup *et al.* Reliable ABC model choice via random forests.  
320 *Bioinformatics* 32, 859-866 (2015).
- 321 23. F. Pedregosa, G. Varoquaux, A. Gramfort *et al.* Scikit-learn: Machine Learning in Python.  
322 *Journal of Machine Learning Research* 12, 2825–2830 (2011).
- 323 24. L.E. Raileanu, and K. Stoffel. Theoretical comparison between the gini index and informa-  
324 tion gain criteria. *Annals of Mathematics and Artificial Intelligence* 41(1), 77-93 (2004).
- 325 25. C.P. Robert, J-M. Cornuet, J-M. Marin and N.S. Pillai Lack of confidence in approxi-  
326 mate Bayesian computation model choice. *Proceedings of the National Academy of Sci-*  
327 *ences* 108, 15112-15117; DOI: 10.1073/pnas.1102900108 (2011).
- 328 26. C.P. Robert Approximate Bayesian Computation: A Survey on Recent Results. In: Cools  
329 R., Nuyens D. (eds) *Monte Carlo and Quasi-Monte Carlo Methods.* Springer Proceedings  
330 in Mathematics Statistics, vol 163. (Springer, Cham. 2016).
- 331 27. J.V. Ross, T. House and M.J. Keeling Calculation of disease dynamics in a population of  
332 households. *PLoS ONE* 5: e9666 (2010).
- 333 28. E.G. Ryan, C.C. Drovandi, J.M. McGree and A.N. Pettitt A review of modern computa-  
334 tional algorithms for Bayesian optimal design. *Int. Stat. Rev.* 84, 128-154 (2015).

- 335 29. P. Touloupou, N. Alzahrani, P. Neal, S.E.F. Spencer and T.J. McKinley Efficient model  
336 comparison techniques for models requiring large scale data augmentation. *Bayesian*  
337 *Anal.* 13, 437-459 (2018).

## 338 **Supplemental Information**

339 The supplemental information contains:

- 340 • Plots of the prior distribution for each epidemic parameter used to generate the household  
341 data (Fig. S1).
- 342 • A comparison of the accuracy of model discrimination as the size of households in the  
343 model varies from 3 to 7. This includes both the complete observation scenarios, and the  
344 scenarios wherein  $p_{\text{obs}} = 0.5$  (Fig. S2).
- 345 • A comparison of the accuracy of model discrimination when parameters are known (fixed)  
346 values versus values sampled from the prior distributions; and of the impact of using 1,000  
347 versus 10,000 training samples (Fig. S3).
- 348 • Model discrimination accuracy when the random forests are trained on the raw, unsum-  
349 marised data rather than the histogram summaries that appear in the main text (Fig. S4).



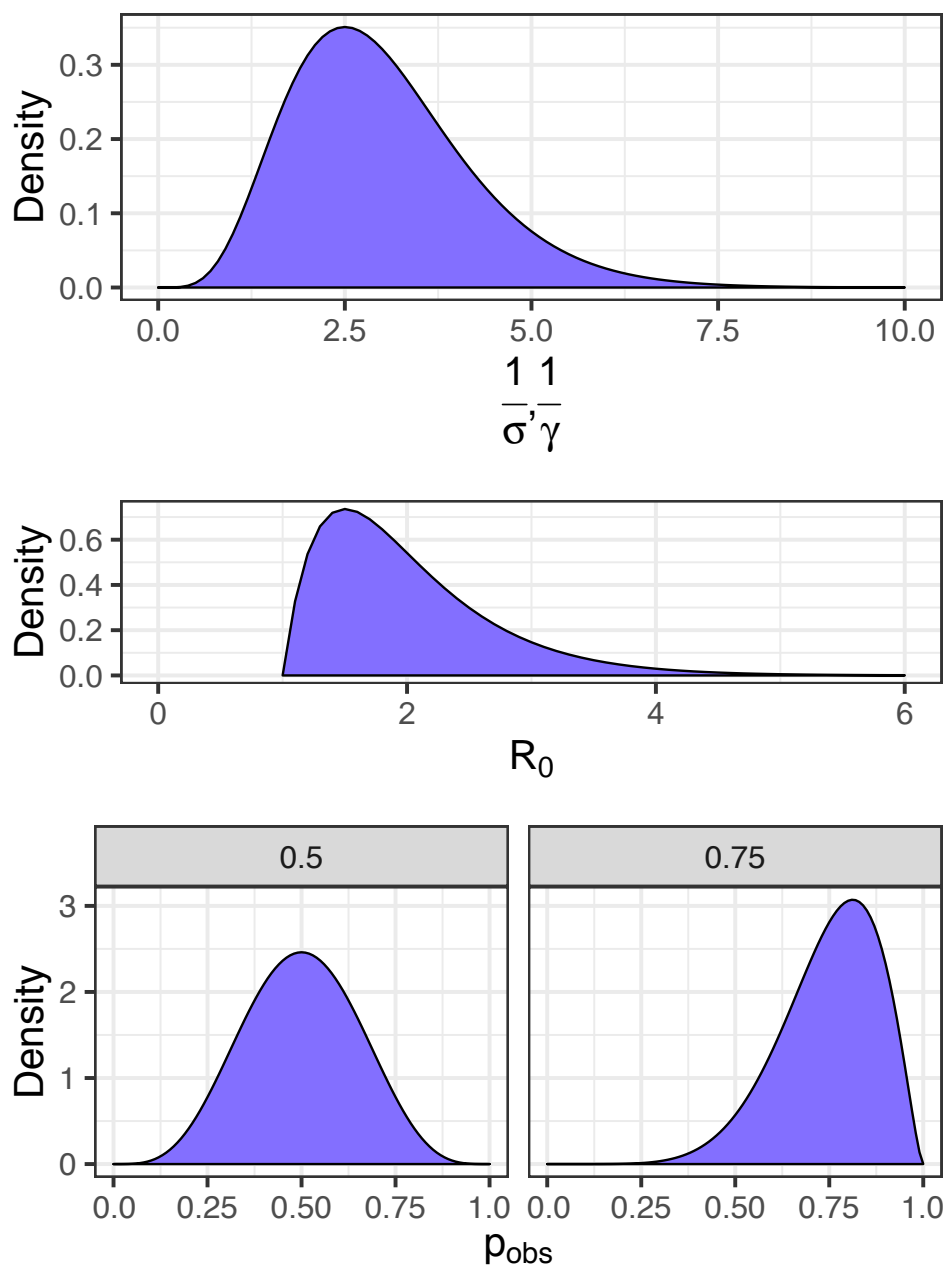

Figure S1: Distributions for model parameters.

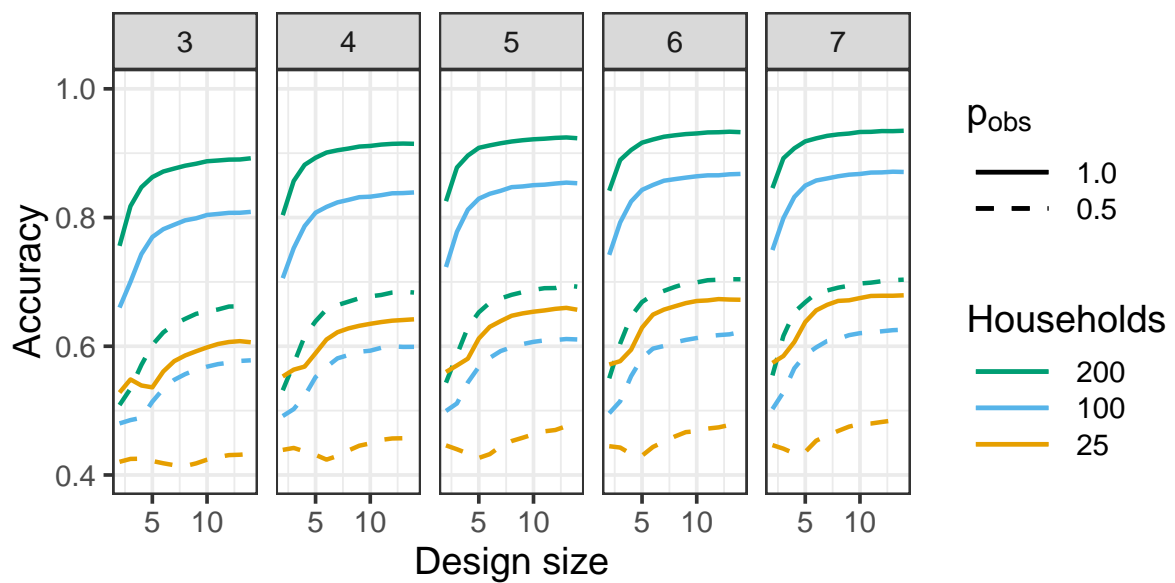

Figure S2: Change in accuracy of optimal designs as household size increases from 3 to 7, under complete observation and mean  $p_{obs} = 0.5$ . Based on 10,000 training simulations and parameters sampled from distributions.

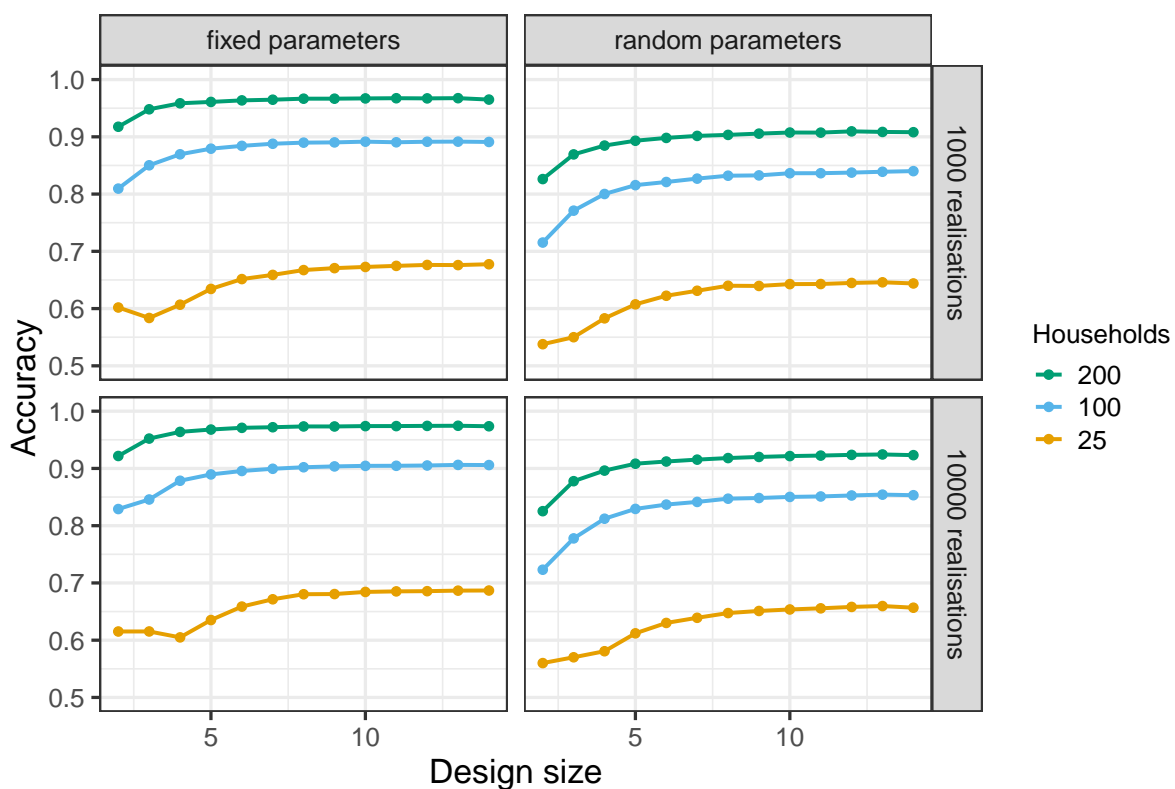

Figure S3: Impact on accuracy of optimal designs as with fixed parameters vs. parameters sampled from distributions, and with 1,000 vs. 10,000 training samples. Based on households of size 5.

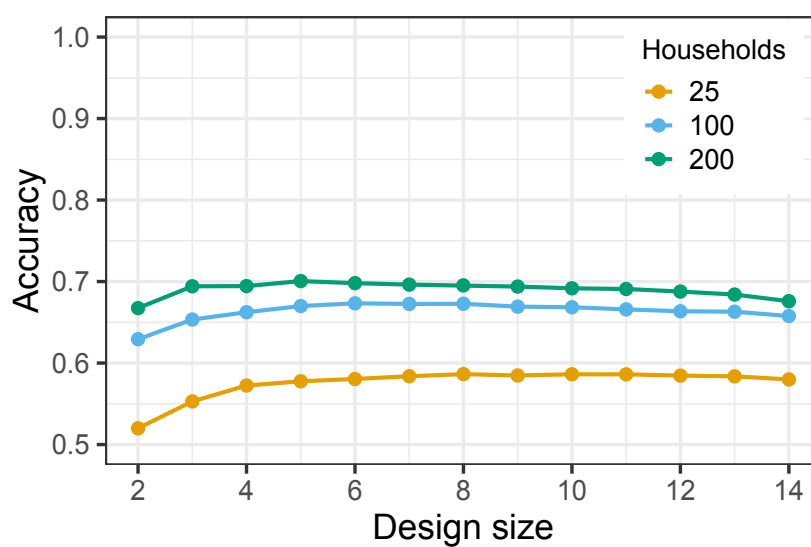

Figure S4: Performance of random forest model discrimination when raw data were used as predictors, rather than histogram summaries (with results in Figure 1d). Based on households of size 5, with 10,000 training points, and random parameters.
